# Supplementary material for: Targeting Immunosuppressive Tumor-Associated Macrophages Using Innate T Cells for Enhanced Antitumor Reactivity
Source: MDPI journal article supplement (doi:10.3390/cancers14112749), 2022-06-01
Supplement: s1 [file s1]

# Supplementary Materials: Targeting Immunosuppressive Tumor-Associated Macrophages using Innate T Cells for Enhanced Antitumor Reactivity

Yan-Ruide Li, James Brown, Yanqi Yu, Derek Lee, Kuangyi Zhou, Zachary Spencer Dunn, Ryan Hon, Matthew Wilson, Adam Kramer, Yichen Zhu, Ying Fang and Lili Yang

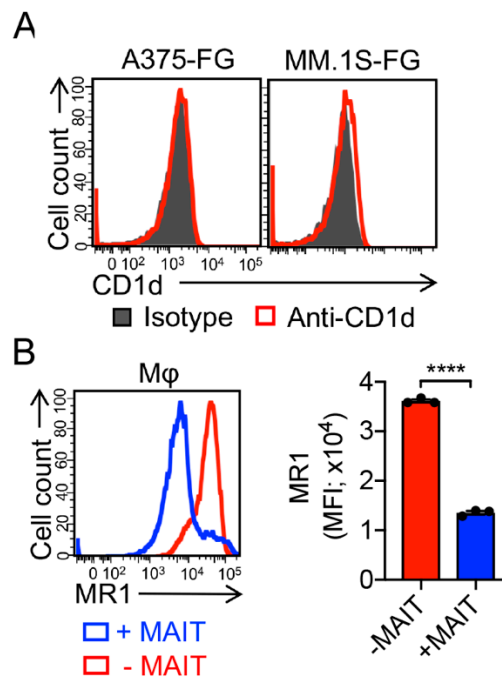

**Figure S1.** CD1d expression on A375 and MM.1S parental cell lines, and phenotype changes of macrophages after co-culturing with MAIT cells. Related to Figure 2 and 3. **(A)** FACS detection of CD1d expression on A375-FG and MM.1S-FG tumor cells. **(B)** FACS analysis of MR1 expression on macrophages with or without co-culturing with MAIT cells ( $n = 3$ ). Representative of three experiments. Data are presented as the mean  $\pm$  SEM. \*\*\*\* $p < 0.0001$ , by Student's  $t$  test.

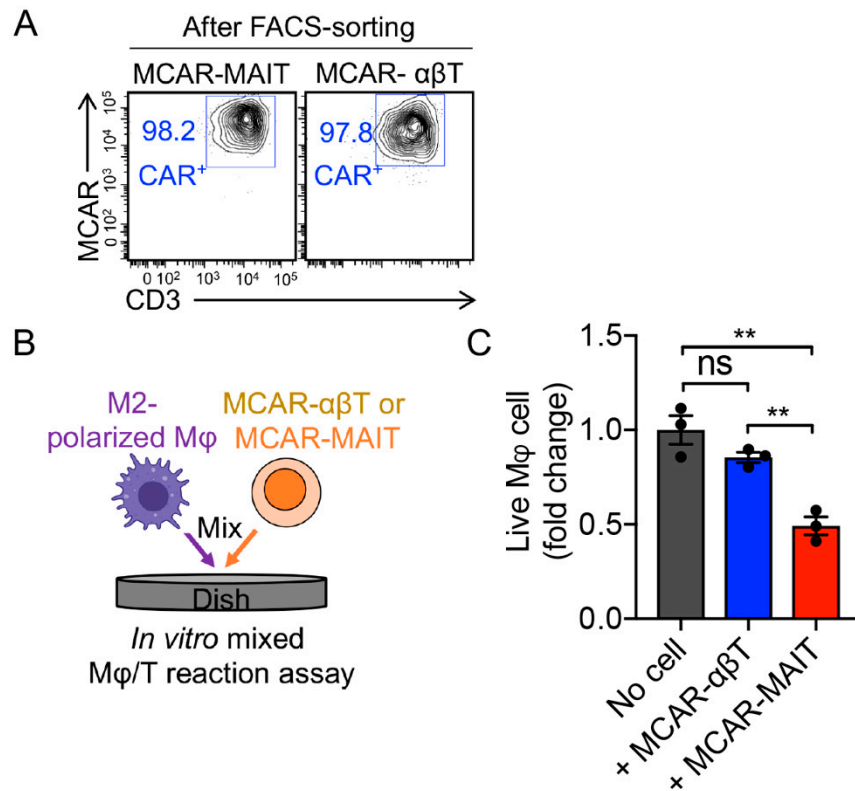

**Figure S2.** *In vitro* targeting immunosuppressive macrophages by MCAR-MAIT cells. Related to Figure 6. **(A)** FACS detection of MCAR expression on MCAR- $\alpha\beta$ T and MCAR-MAIT cells after FACS-sorting. **(B)** Experimental design. **(C)** FACS analysis of live macrophages 24 hours after co-culturing with MCAR- $\alpha\beta$ T or MCAR-MAIT cells. Live cells were identified as e506-CD14<sup>+</sup>CD11b<sup>+</sup> ( $n = 3$ ). Representative of three experiments. Data are presented as the mean  $\pm$  SEM. ns, not significant, \*\* $p < 0.01$ , by one-way ANOVA.
